# Supplementary material for: TiO2doped polydimethylsiloxane (PDMS) andLuffa cylindricabased photocatalytic nanosponge to absorb and desorb oil in diatom solar panels
Source: Royal Society of Chemistry journal article supplement (doi:10.1039/c9ra03821c), 2019-01-01
Supplement: c9ra03821c1.pdf [file c9ra03821c1.pdf]

## ESI File

### TiO<sub>2</sub> doped polydimethylsiloxane (PDMS) and *Luffa cylindrica* based photocatalytic nanosponge to absorb and desorb oil in diatom solar panels

Mohd Jahir Khan<sup>a</sup>, Ramesh Singh<sup>b</sup>, Khashti Ballabh Joshi<sup>b,\*</sup> and Vandana Vinayak<sup>a,\*</sup>

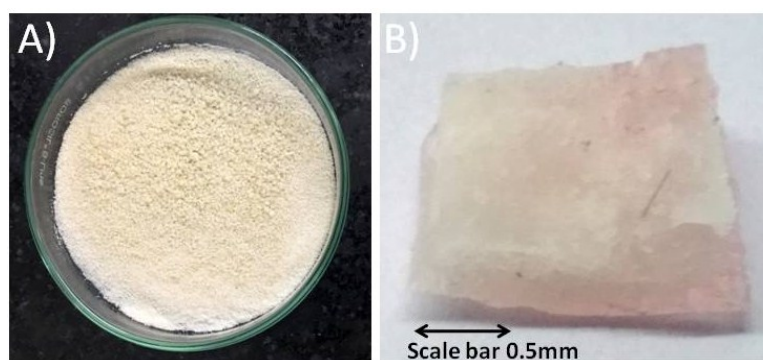

**Fig. S1** PDMS sponge made by sugar templating (A) Powdered sugar granules and (B) PDMS sponge after sugar templating and curing.

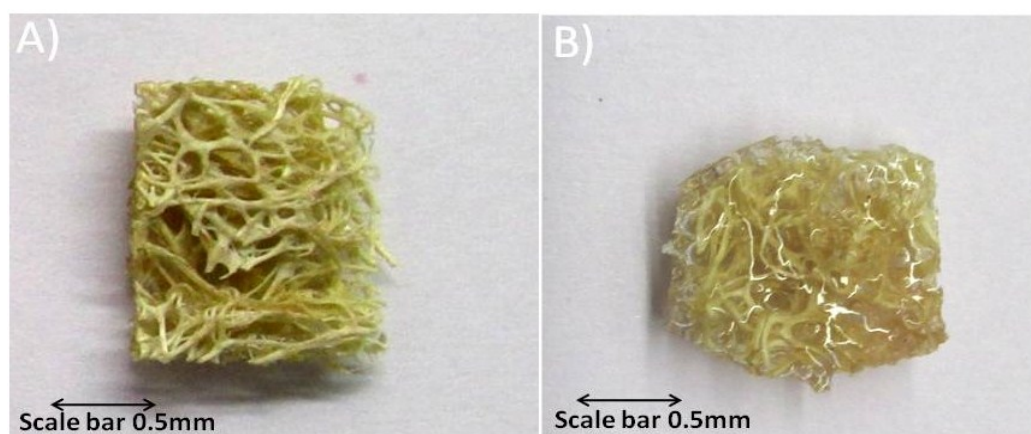

**Fig. S2** Fabrication of PDMS-*Luffa* sponge (A) Cleaned *Luffa* fibre, (B) PDMS-*Luffa* sponge.

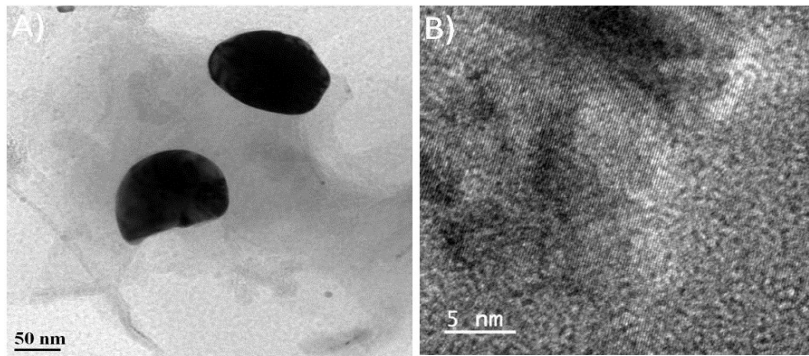

**Fig. S3** (A) TEM image  $\text{TiO}_2$  nanoparticle, (B) high-resolution TEM image of  $\text{TiO}_2$  nanoparticle.

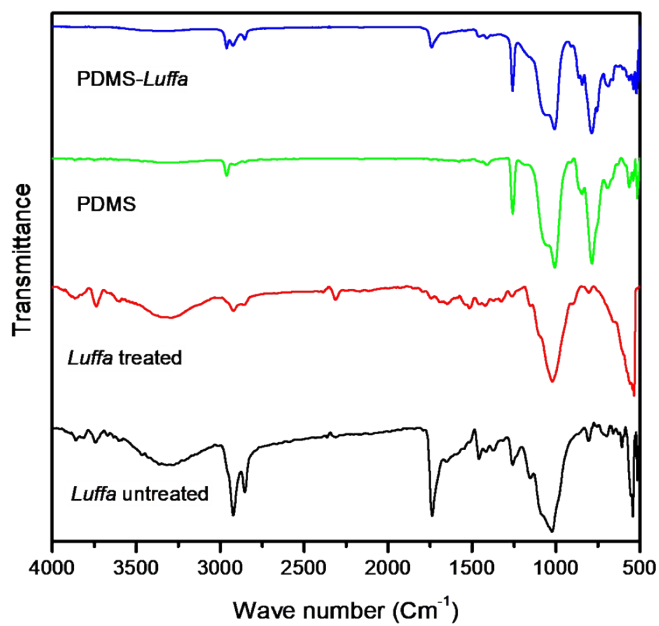

**Fig. S4** FTIR spectra of untreated *Luffa* fibre (Black), treated *Luffa* fibre (Red), PDMS (Green) and PDMS-*Luffa* sponge (Blue).

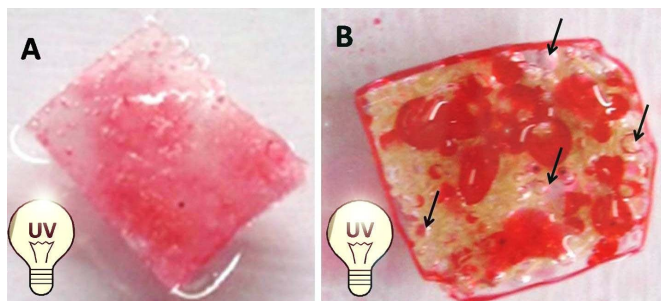

**Fig. S5** Exposure to UV light at 300 nm shows (A) No bubbling or desorption in case of undoped PDMS and (B) Bubbling of gases in PDMS-*Luffa*- $\text{TiO}_2$  nanosponge.
